# Supplementary material
Source: PubMed Central journal article supplement (PMC404063)

**A**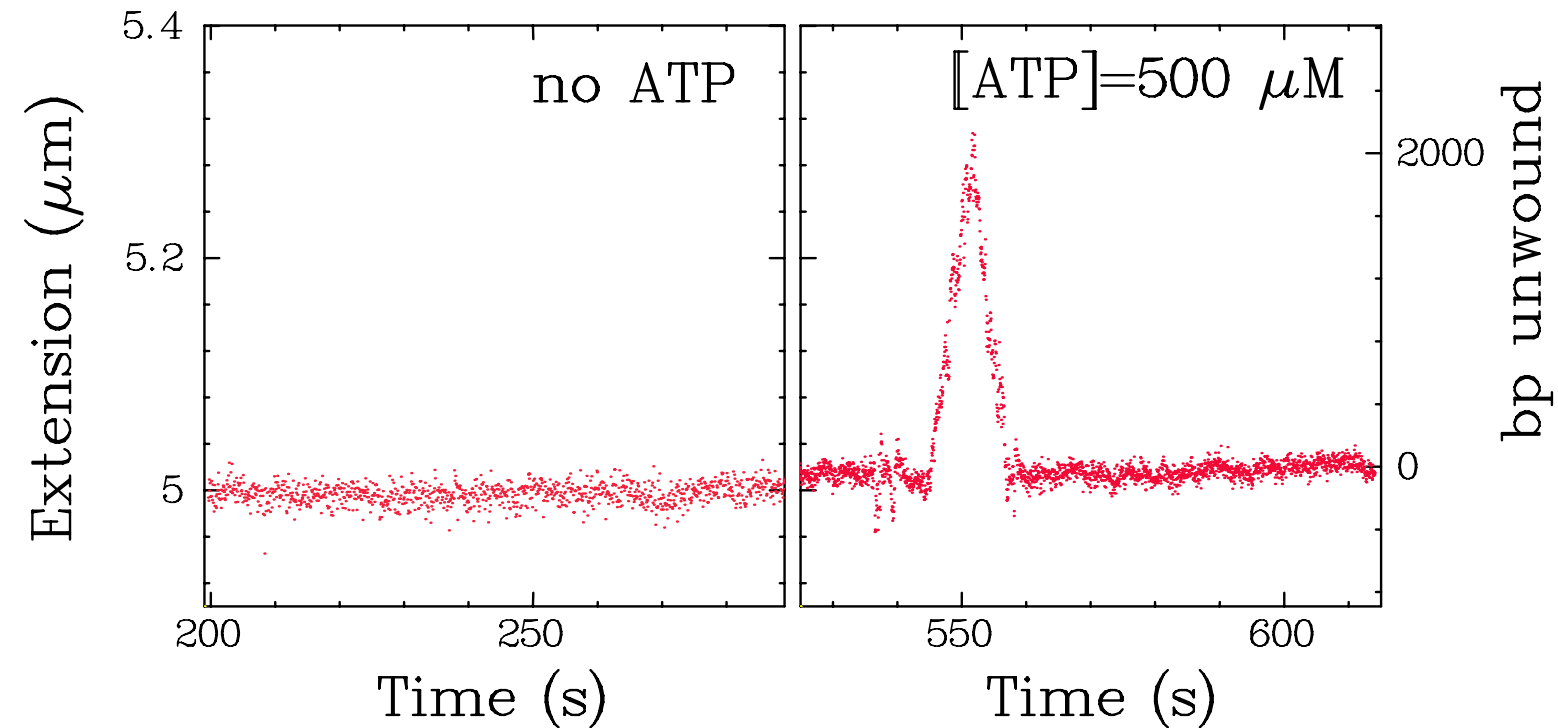

**B**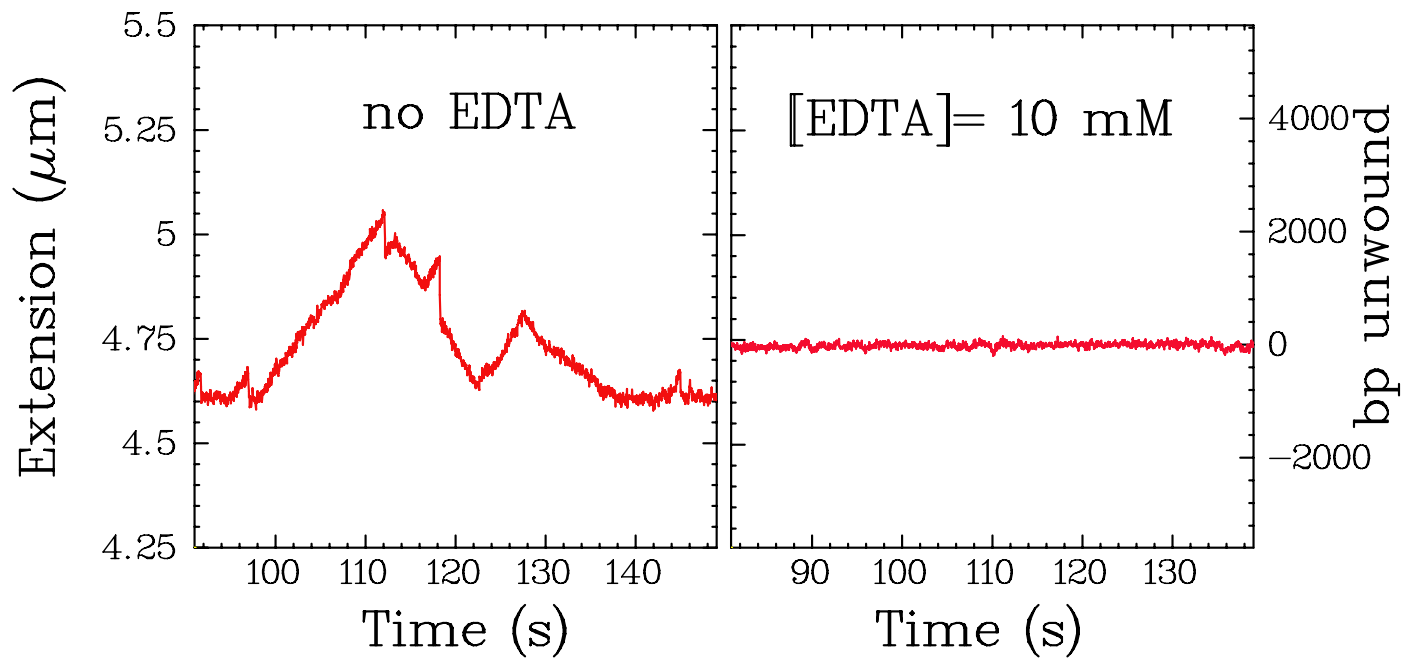

Supplement: pnas_101_17_6439__1.pdf [file pnas_101_17_6439__1.pdf]
